# Supplementary material for: vhfRNAi: a web-platform for analysis of host genes involved in viral infections discovered by genome wide RNAi screens
Source: Royal Society of Chemistry journal article supplement (doi:10.1039/c6mb00841k), 2017-05-19
Supplement: c6mb00841k1.pdf [file c6mb00841k1.pdf]

## vhfRNAi: A web-platform for analysis of host factors involved in viral infections discovered by genome wide RNAi screen

Anamika Thakur<sup>#</sup>, Abid Qureshi<sup>#</sup> and Manoj Kumar<sup>\*</sup>

Bioinformatics Centre, Institute of Microbial Technology, Council of Scientific and Industrial Research, Sector 39A, Chandigarh-160036, India

<sup>#</sup>Equal contribution

<sup>\*</sup> To whom correspondence should be addressed. Tel, 91-172-6665453; Fax, 91-172-2690585; 91-172-2690632; Email, [manojk@imtech.res.in](mailto:manojk@imtech.res.in)

### Supplementary Tables

**Table S1:** Statistics of unique and duplicate host factors in each virus

**Table S2:** Table denoting genes common among different viruses

**Table S3:** Statistics of GWAS analysis

**Table S1.** Statistics of unique and duplicate host factors in each virus

| S. No. | Virus                                     | Unique-Entries | Duplicate-Entries |
|--------|-------------------------------------------|----------------|-------------------|
| 1.     | Adeno-associated virus (AAV)              | 926            | 533               |
| 2.     | Avian influenza virus (AIV)               | 0              | 11                |
| 3.     | Borna disease virus (BDV)                 | 14             | 20                |
| 4.     | Dengue virus 2 (DEN-2)                    | 27             | 13                |
| 5.     | Hepatitis C virus (HCV)                   | 236            | 213               |
| 6.     | Human immunodeficiency virus 1 (HIV)      | 1388           | 857               |
| 7.     | Human parainfluenza virus 3 (HPIV-3)      | 0              | 27                |
| 8.     | Human herpesvirus 1 (HSV-1)               | 34             | 38                |
| 9.     | Influenza A virus (IAV)                   | 700            | 513               |
| 10.    | Lymphocytic choriomeningitis virus (LCMV) | 0              | 54                |
| 11.    | Marburgvirus (MARV)                       | 0              | 11                |
| 12.    | Poliovirus (PV)                           | 3340           | 1035              |
| 13.    | Rotavirus (RV)                            | 347            | 175               |
| 14.    | Sendai virus (SeV)                        | 32             | 27                |
| 15.    | Sindbis virus (SIV)                       | 70             | 41                |
| 16.    | Vaccinia virus (VACV)                     | 482            | 296               |
| 17.    | Vesicular stomatitis virus (VSV)          | 9              | 78                |
| 18.    | West Nile virus (WNV)                     | 313            | 137               |

**Table S1.** Statistics of unique host factors for each virus having overlapping and unique factors in different viruses

| S. No. | Virus                                  | Overall-Entries | Non-overlap – Entries (Unique) | Overlapping -Entries |
|--------|----------------------------------------|-----------------|--------------------------------|----------------------|
| 1.     | Adeno-associated virus (AAV)           | 1459            | 926                            | 533                  |
| 2.     | Avian influenza virus (AIV)            | 11              | 0                              | 11                   |
| 3.     | Borna disease virus (BDV)              | 34              | 14                             | 20                   |
| 4.     | Dengue virus 2 (DEN-2)                 | 40              | 27                             | 13                   |
| 5.     | Hepatitis C virus (HCV)                | 449             | 236                            | 213                  |
| 6.     | Human immunodeficiency virus 1 (HIV-1) | 2245            | 1388                           | 857                  |
| 7.     | Human parainfluenza virus 3 (HPIV-3)   | 27              | 0                              | 27                   |
| 8.     | Human herpesvirus 1 (HSV-1)            | 72              | 34                             | 38                   |

|     |                                           |      |      |      |
|-----|-------------------------------------------|------|------|------|
| 9.  | Influenza A virus (IAV)                   | 1213 | 700  | 513  |
| 10. | Lymphocytic choriomeningitis virus (LCMV) | 54   | 0    | 54   |
| 11. | Marburgvirus (MARV)                       | 11   | 0    | 11   |
| 12. | Poliovirus (PV)                           | 4375 | 3340 | 1035 |
| 13. | Rotavirus (RV)                            | 522  | 347  | 175  |
| 14. | Sendai virus (SeV)                        | 59   | 32   | 27   |
| 15. | Sindbis virus (SIV)                       | 111  | 70   | 41   |
| 16. | Vaccinia virus (VACV)                     | 778  | 482  | 296  |
| 17. | Vesicular stomatitis virus (VSV)          | 87   | 9    | 78   |
| 18. | West Nile virus (WNV)                     | 450  | 313  | 137  |

**Table S2:** Table denoting genes common among different viruses

| S. No. | Number of virus | Gene name                                                                                                                                                                                                                                                                                                                                                                                                                                                                                                                                                                                                                                                                                                                                                                                                                                                                                                                                                                                                                                                                                                                                                                                                                                                                                                                                                                                                                                                                                                                                                                                                                                                                                                                                                                                                                                                                                                                                                                                                                                                                                                                                                                                                                                                                                                                                                                                                                                                                                                                                                                                                                                                                                                                                                                                                                                                                                                                                                                                                                                                                                                                                   | Total number of genes |
|--------|-----------------|---------------------------------------------------------------------------------------------------------------------------------------------------------------------------------------------------------------------------------------------------------------------------------------------------------------------------------------------------------------------------------------------------------------------------------------------------------------------------------------------------------------------------------------------------------------------------------------------------------------------------------------------------------------------------------------------------------------------------------------------------------------------------------------------------------------------------------------------------------------------------------------------------------------------------------------------------------------------------------------------------------------------------------------------------------------------------------------------------------------------------------------------------------------------------------------------------------------------------------------------------------------------------------------------------------------------------------------------------------------------------------------------------------------------------------------------------------------------------------------------------------------------------------------------------------------------------------------------------------------------------------------------------------------------------------------------------------------------------------------------------------------------------------------------------------------------------------------------------------------------------------------------------------------------------------------------------------------------------------------------------------------------------------------------------------------------------------------------------------------------------------------------------------------------------------------------------------------------------------------------------------------------------------------------------------------------------------------------------------------------------------------------------------------------------------------------------------------------------------------------------------------------------------------------------------------------------------------------------------------------------------------------------------------------------------------------------------------------------------------------------------------------------------------------------------------------------------------------------------------------------------------------------------------------------------------------------------------------------------------------------------------------------------------------------------------------------------------------------------------------------------------------|-----------------------|
| 1.     | 2               | 3HAO, 5HT3D, 5NT1B, AAPK2, ABHD1, ACBD4, ACHA6, AFG32, AGRE1, AINX, AKP8L, ALDH2, AMGO2, AN32D, ANKR6, ANM8, ANXA6, AP3S1, APC1, ARHGH, ARL16, ARM10, ARRB1, ASNA, AT133, AT2C1, AT5G1, ATS14, BACE1, BAHD1, BAMBI, BCAR1, BCCIP, BEND2, BFSP1, BOC, BORG2, BORG5, BPNT1, BRD4, BTBD6, BTBD8, C8AP2, CASP9, CASZ1, CBPQ, CC14A, CCL8, CCNH, CCNT1, CCR8, CD20, CD276, CEBPE, CETN2, CGAT1, CHIN, CHST5, CIRBP, CLD20, CLH1, CNTD2, CO3, CO4B, COL10, COPT2, CP086, CQ053, CROC4, CS048, CSTF3, CTSL2, CUL2, CX7B2, CYFP2, CYH3, CYTC, DAZ1, DC1I2, DC2L1, DDC, DDX10, DDX41, DEFM, DEST, DHSO, DJB11, DJC12, DKK2, DMRTC, DP13B, DPOG2, DPP10, DPP9, DQX1, DRD4, DRS7B, DUS15, DUS6, DYN1, DYSF, EGFL6, EMC7, EPHA3, EPHA4, ERBB4, ERMIN, ESAM, ESTD, EVI5, EVPL, EXOS9, F101B, F213A, F217A, F262, FBXW2, FCG2A, FEM1C, FGF21, FGF22, FMO4, FMR1, FOXA2, FOXN4, G6PD, GAS6, GATA3, GDPD5, GEMI7, GET4, GLI4, GNAT1, GORS2, GP183, GPC1, GPR31, GPR35, GPR52, GRB2, H2BWT, H31, HACD1, HACE1, HBG1, HCD2, HEMH, HES5, HINFP, HPIP, HS3S6, HTSF1, HYI, I20RB, I27RA, I5P1, IKKA, IL3, IPYR2, IQEC3, ISG20, ISM2, ITCH, ITSN1, JOS2, JPH1, K0556, K2022, KAISO, KAPCG, KAT5, KATL1, KCNA3, KCNH5, KDM3B, KIF24, KLF6, KLF7, KLH24, KLH36, KMT5A, KPCD, KRT81, KRT83, KRT84, LAG3, LAMA5, LAMB2, LBX1, LCE1E, LENG9, LIIMS1, LLR1, LONF3, LRP1B, LRRC4, LST1, LTV1, LYAR, LYPD4, LYVE1, M3K10, MAD3, MAGB3, MAK, MARK3, MCA3, MCAF2, MCM3, MCM6, MED15, MET, MET13, MFAP2, MFF, MGRN1, MISP, MOB3C, MORC2, MSH6, MTA2, MYH8, MYL1, MYOG, MYPT1, MZT2A, N42L2, NAAA, NAGPA, NASP, NDKM, NDRG4, NEB1, NEC2, NECD, NOD1, NOLC1, NOVA2, NP1A1, NT5C, NTM2G, NUDT3, O13C9, O51Q1, OAZ1, OFUT1, ONEC2, OPRM, OPSG2, OR2L8, OR4D1, OR4X2, OR511, OR6B1, OR6M1, OR6T1, OR8B8, OR8G5, OSTC, OTOSP, P2RY2, PADI4, PAI2, PAN2, PANK1, PANK4, PAR10, PATE1, PAX1, PCDG8, PCDH7, PCGF5, PCNA, PGS2, PHAG1, PHF12, PHF7, PHLA2, PINK1, PKHG1, PLB1, PLCD4, PLIN3, PLPP4, PLXA3, PODN, PP1R7, PPM1F, PPR17, PRD12, PRD16, PRDM4, PRG2, PRIC1, PRP19, PRY, PSMF1, PTGIS, PTGR2, PTPA, PTPRC, PUR4, PXDC1, QCR1, RABL6, RAD50, RBMX, RBX1, RD23A, REST, RET7, RFA2, RFX5, RHG09, RHG24, RHOH, RHOV, RIPP2, RIR2, RL41, RL7L, RM39, RN125, RN19A, RPA34, RPAB1, RPAB5, RPAP3, RT09, RTBDN, RTP4, S100P, S10AA, S26A6, S5A1, S7A14, SARDH, SAXO1, SC5A6, SC6A9, SCOC, SDF1, SECR, SELPL, SEM7A, SFPQ, SG1D2, SIA8D, SIDT2, SIVA, SL9A2, SLAP2, SLD5, SMC1A, SNTG2, SNX12, SNX4, SOX15, SPAG8, SPHAR, SPIDR, SPP24, SPS2, SPTCS, SRGP3, SRS10, ST18, SUCA, SUCR1, SUN2, SUPT3, SUV91, SYMPK, SYNPO, T2R16, T2R20, TAGL, TAGL3, TAP1, TAP26, TCPB, TEAD1, TENN, THAS, THOC3, TIAF1, TIM10, TIM44, TIM9, TLK2, TMOD1, TNFB, TNIP2, TOR4A, TPC12, TR13C, TRI35, TRI52, TRI69, TRI72, TRIA1, TUFT1, TYK2, U2AF2, UB2D1, UBE4A, UBP35, UBP53, UGPA, ULA1, UPK3B, UTS2B, V2R, VAMP1, VATG1, VEGFB, VPS39, VSIG1, VWCE, WASF1, WDR33, WFDC8, WIPI4, XAF1, YMEL1, Z385A, ZACN, ZG16B, ZMY10, ZN358, ZN454, ZN496, ZN519, ZN526, ZN551, ZN599, ZNF69, CATL1, COPD, NPC1, TIM, VAOD1, VAS1, VATL, A4GNT, ABHD11, B3GAT2, CARD9, CPA1, FDPS, FPGS, FURIN, HIPK4, KLK1, PRMT2, | 1535                  |

---

QPCT, SLC22A23, TMPRSS3, TRPT1, BTBD9, CNOT2, EXD2, FOXB1, GANAB, GCH1, NRG1, UBE2E3, ABCB6, ABHD2, ACOT8, ADRBK1, ALPK1, ANKK1, AP1M1, ARRDC2, BAAT, BCAT1, BCKDHA, BMPR2, CADM2, CALM2, CASP4, CCDC8, CCL26, CD81, CDC42, CDC6, CDK11B, CDKN1B, CEBPD, CELF6, CHKA, CHUK, CKAP5, CSNK1A1L, CSNK2A1, CTGF, CX3CL1, DBNDD1, DDOST, DDR2, DDX3X, DGAT1, DGKB, DLGAP4, DNAJB1, DTX3L, EIF2AK4, FANCE, FGR, GAK, GCK, GIT1, GNB2L1, GSAP, HAS1, HCCS, HIPK3, IFITM1, IGFBP6, IKBKB, IL4I1, IMPDH1, IQCB1, ITPKA, KCNJ3, KCNK4, KCNQ4, MAP2K2, MAP3K14, MAP4, MAPK1, MAPK7, MCHR2, MED12, MPP6, MTHFSD, MYO3A, MYOF, NAPA, NCOA6, NMT1, NOC4L, NOP58, NOX1, NRSN1, NUAQ2, NUF2, OTUB1, PIK3R4, PKN2, PLK1, PLK3, PNO1, PPP2R1A, PRKAG2, PRKCZ, PRPSAP2, PSME1, PTCD1, PTK2B, PTPRH, RABEPK, RAC1, RBM22, RGPD5, RGR, RHOA, RIOK1, RNF31, RPS6KA5, RPS6KL1, SHARPIN, SMAD6, SMARCD3, SMURF1, SNRNP35, SPCS2, SPCS3, SPEG, SRI, STK38, TBL3, TECR, TFAP2A, TNFRSF18, TNK2, TOP1, TRRAP, UBA52, UPK3A, USP42, WDR43, WIF1, WNK4, XPNPEP1, ZNF148, ZNF608, ZNRF2, ZAAAB, ABCA7, ABCG1, ABTB1, ACL6A, ACTN1, ADAMTS5, ADRM1, AEN, AGO3, AKAP13, ALG3, ALKBH3, AN13A, ANAPC2, ANM3, ANXA5, AOFA, APBB3, AQP11, AQR, ARF4, ARHG6, ARHG8, ARI4A, ARID1A, ARL4C, ARPC1A, ASXL2, AT12A, AT1B3, ATD3A, ATF4, ATF6A, ATG7, ATP5B, ATP6V0A1, ATRX, AUHM, B3GT4, BCR, BCS1, BLK, BRCA1, BRX1, BT3A2, BTF3, BYST, BZW2, C1TM, C2TA, C42S2, C5ORF45, CALCOCO1, CALU, CAMK1D, CAPN6, CASP3, CAV2, CBP, CBX3, CCAR1, CCL3, CCL5, CCND3, CCR7, CCT2, CD4, CDK6, CELR3, CENPX, CEP68, CHAF1A, CHK1, CHRNA7, CHSS2, CK5P1, CKLF, CLC2B, CLCF1, CLIC3, CLK4, CLU, CN028, COG2, COG4, COPT1, COQ3, COR1B, CRLS1, CRT3, CRYAB, CSTF1, CSTF2, CTDP1, CTDS2, CTSZ, CYCS, DACT1, DAPK2, DCE1, DCNL5, DCP2, DDX31, DDX56, DDX58, DECR, DEN5A, DFFA, DFNA5, DHRS2, DHRS9, DHX15, DKC1, DLK2, DLL3, DMAP1, DNA2, DNAJA2, DNAL1, DNJA3, DNM2, DPM2, DPOA2, DRG1, DTX4, DUS2, E2F5, E2F6, EAF2, EBP2, ECE2, EEPD1, EM55, ENOB, ENPLL, ENPP3, EPS15, EPS8, EPT1, ERMAP, EST1, ETS2, EVI2B, EVL, EXO1, EXOS4, EXOS8, EZH2, FA5, FABD, FAKD2, FBXW11, FHL2, FLII, FLOT1, FNTA, FOSL1, FOXN2, FXR1, GABPB2, GAR1, GATC, GBG10, GCNT1, GDF15, GGCT, GLIP1, GNA11, GNL3, GP180, GPD2, GPT, GRAA, GRAP, GTF2A1, GTPB3, GTR6, HAGHL, HAUS7, HERC1, HGS, HID1, HLF, HMGA1, HNRNPU, HOP, HS90B, HSP7E, HXK2, HYOU1, ID2, IF2P, IFI27, IKBA, IKBP1, IL1A, IL26, IL36G, IL5RA, ILDR1, IN80C, INTS6, INTS7, IQCA1, IRF4, IRF8, IRS2, ITM2C, ITPR1, JADE3, JAK1, JAK2, JIP3, JMY, K0355, KAD2, KAT2A, KC1G1, KCNG1, KCNJ11, KCNJ5, KCNK5, KCTD5, KDM7A, KHDRBS3, KIME, KIT, KLF2, KLHL1, KLRD1, LACTB, LAS1L, LCOR, LCP2, LHFP, LIF, LONM, LPAR2, LYN, LYRM4, M3K1, MANBA, MAOM, MAP3K7, MATK, MATR3, MBOA7, MBP, MCLN2, MED19, MED27, MED31, MENTO, MEP50, MESP1, MFHA1, MGT4A, MIC19, MK13, MKNK2, MKRN2, MMP13, MMP25, MOAP1, MOS, MPIP1, MPP2, MPZL1, MRE11, MRE11A, MRT4, MS18A, MT1H, MT2A, MTEF3, MTX1, MYO19, NAF1, NALP2, NCALD, NCEH1, NCOR2, NDC1, NDFIP1, NDRG1, NDUF4, NF2, NFIL3, NFS1, NGDN, NOCT, NOG1, NPL, NRBP1, NRP1, NTN1, NUCL, NUMBL, NUP214, NUP62, NXF1, NXT1, OGR1, OLIG3, ONCM, OPN4, OPTN, ORC6, OSB1, OSBPL6, OTU6B, P2RX4, P2Y11, P5CR1, PA2G4, PARL, PARVB, PCCB, PCDH11X, PCSK6, PD2R, PDIA6, PECA1, PEO1, PER3, PEX2, PFKAM, PGAM4, PHF3, PI16, PIP5K1C, PK1IP, PKN1, PLCB2, PLCG2, PLOD3, PM20D1, PNPH, POLR2A, POLR2C, POLR2H, POLR2L, POP7, PP1B, PP1L1, PRDM10, PRDM7, PRDX3, PREP, PRIO, PRPF8, PRPS1, PSMA3, PSMB6, PSMC3, PSMD4, PSME2, PTPRU, PUM3, PUR6, RAB28, RAB2A, RAB6A, RAB8B, RAD51, RAD54, RALB, RAP1B, RBFA, RBM10, RBM19, RBM28, RBM39, RERE, RFC2, RFC3, RGS1, RGS18, RHG25, RIPK3, RM02, RM37, RMI1, RNASEL, RND1, RNF10, RNF26, RNF5, RNPS1, RPAB3, RPC6, RPC7, RPF2, RPL10A, RPL18, RPS6KA3, RRBP1, RRP15, RSL1D1, RT12, RTN2, RUVB1, RUVB2, S10A4, S19A1, S1PR5, S29A1, S35F3, S39A4, S39AE, SAHH, SAMC, SAMM50, SAP30, SAPC2, SC61G, SC6A2, SC6A5, SCAFB, SCAM3, SCFD1, SDCB1, SDG3, SDF4, SEC61G, SEM4A, SFXN3, SHPK, SIAT9, SIG10, SLC25A12, SLC40A1, SLC4A7, SLU7, SNRPD1, SNTB1, SOCS1, SPA5L, SPAG1, SPATS2L, SPB8, SPEN, SPP2B, SPRY7, SPSB3, SRP54, SRPRA, SRRT, SRSF2, SRSF6, SSA27, SSF1, SSR1, SSR2, STAB1, STK4, SUMO2, SURF6, SYFA, SYMC, SYNE2, T200A, TAF1A, TANK, TAOK1, TBB3, TBB6, TCF20, TCFL5, TERF2, TEST, TF2H3, TFAP4, TFB2M, TFDP2, TFE3, TIAM1, TIM23, TIMP1, TIPIN, TM244, TM245, TMED1, TMEM132C, TMEM163, TMUB2, TNFRSF4, TNPO3, TNRS5, TNRS6, TOM34, TOPK, TOR2A, TPC, TPIS, TPT1, TPTE, TRAF5, TRAP1, TRAPPC1, TRAPPC8, TRIB3, TRIM1, TRIM7, TRIM8, TRM11,

---

---

TRUA, TRUB1, TTC4, TTL12, TTMP, TXK, TXND5, UBE2C, UBE2D3, UBE2E1, UBE2L3, UBE2T, UBF1, UBP13, UBQL1, UBQLN4, UBR5, UCK2, UCP2, UNG, UPP1, UQCC1, UQCRC1, USE1, USP6, USP9X, UTP15, UTRO, UXT, VEZF1, VISTA, VKORL, VPS4A, WDR12, WDR4, WDR75, WNK1, WNT1, XCL1, XPOT, XRCC3, XRCC6, YBOX3, ZAP70, ZBT16, ZBT32, ZBTB2, ZCCHV, ZEB2, ZEP2, ZN165, ZN394, ZNF552, ZNT5, ZSCAN16, CBX5, GTF3C2, HOXC5, IFITM2, ITGA2, MYRIP, NR4A2, RALGPS2, TOP2A, UBE2I, VAMP8, WRB, ACAP2, ACTN2, ADAMTS1, AFF2, AGTRAP, APC, APOA1, APOA5, APOBEC3G, ARL4A, ATP1A2, ATP6AP1, ATP6V1A, BANP, BID, BST2, BTG1, CACNA1A, CACNB1, CADM1, CBLL1, CEL, CFLAR, CHMP2B, CIT, CLIC4, CLK1, CNP, COPZ2, CREB1, CREB3, CRYAA, CSE1L, CTH, CYLD, CYP2U1, DCLRE1B, DFFB, DGKD, DHCR7, DLG2, DPF2, DTX2, DTX3, EEF1A1, EGR3, EIF2S1, EIF3D, EIF4A3, EPHB2, EPRS, ETS1, F13A1, FKBP1B, FKBP8, FOS, FOXN1, FPR1, FZD5, GINS2, GMEB1, GOPC, GRK5, GRK6, GYS1, HDAC3, HLA-B, HLA-G, HOXC12, HRK, HSF4, HSPB8, HSPD1, HUNK, IFNB1, IGSF1, IL17RA, INMT, INPP4A, INTS12, IRAK3, IRF1, IRF6, ITGA3, ITPK1, KIF11, KSR2, LEPR, LSR, LZTS2, MADD, MAL2, MAN2B2, MAP2K3, MAPK13, MAPK14, MARK2, MATN3, MEF2C, MICA, MTOR, MTSS1, MYH9, NAA10, NAGK, NBN, NCK2, NFAT5, NFKBIE, NLRC4, NPY1R, NTHL1, NUPL1, NUTF2, OAS1, PAK3, PCK2, PDGFA, PEPD, PIEZO1, PIP, PLA2G2F, PLA2G5, PLK2, PLK4, PNMA1, POLA1, PPARA, PQLC1, PRKRA, PSMD14, PTAFR, PTPN11, PTPRM, PUSL1, RACGAP1, RBM14, RCVRN, RETN, RFFL, RING1, RPL13, RPL31, RPL35, RPS10, RPS16, RPS4X, RPS5, RRP1B, RXRG, RYBP, SART1, SCN8A, SELPLG, SF3B3, SFXN2, SIN3B, SLC25A28, SLC7A4, SMG1, SNRNP70, SNX6, SNX9, SOX9, SRSF5, STAC3, STAU1, STK31, SUMO4, TAB1, TAF12, TAOK3, TCF3, TCF7L2, TDRD7, TEAD3, TGFBR1, THRSP, TLDC1, TLR10, TMEM140, TNIP3, TONSL, TPST1, TRIM22, TRIM63, TRMT61A, TRPV2, TSSK6, TUBB3, UBP1, UBXN10, USF2, VAV2, WASF3, WDR34, WDR83, WTAP, XCR1, ZMIZ1, ZNF512B, ADAL, BBC3, CARD14, FAM167B, FOXF2, GABBR2, LAMC3, LYSMD1, NRL, OR7A10, P2RY10, PIWIL3, TAS2R19, ZNF446, ACTN4, ADCK1, ADCY4, AHSP, AP3S2, APOBR, AQP3, ASIC5, CALY, CAP1, CD244, CLGN, CMIP, CNN3, CNTN3, COIL, CPEB4, CPT1C, CRIPT, CSRP3, CUL5, DNAL4, DOK2, DYRK4, E2F4, EIF3M, ELF1, EMP2, ERBB3, FANCA, FCRLA, FEV, FUBP1, FUT4, GAB1, GAB3, GRHL3, GSC, HEPN1, HERC3, HNF1A, KCNE1, KCNE2, KCNH4, KCNJ8, KCNQ3, KCTD4, KRT34, LAMC2, LCK, LENEP, LMO3, LSM8, LY6E, MAST4, MED22, MEGF8, MFAP5, MPPE1, MS4A7, MTA3, MYH1, MYL10, MYO1E, NEK2, NFE2, NIPA2, NSD1, NTF4, OCLN, OR3A2, OR6N2, P2RY1, PANX3, PCDH8, PDPR, PDZD7, PIAS2, PSCA, PTPRF, RAB1A, REXO4, RNF43, SCRIN2, SFTPD, SH2B1, SHC2, SHOC2, SMAD2, SP100, SRP19, SSH3, SYT7, TAF1B, TAF6, TANC1, TBCB, TBRG1, TFEB, TRHDE, TRPM1, UBR3, UCK1, USPL1, VHL, VN1R1, WASF2, WDR6, WNT2B, XYLT1, ZNF18, ADCK5, ARPC1B, BDP1, BICC1, CALML4, CD84, CDH5, CELF5, CLCA2, CLIC1, CTDSP1, EPX, GP1BA, NACA, NRXN1, PPP1R12B, PRKAB1, RPL11, RPL14, RPL37, RPL37A, RPS3, SH3BP5L, SLC26A2, CITED2, LDB1, PRRX2, ITFG3, EXOSC9, FAM214B, RABGEF1, RASSF1, SP6, STK33, TNS4, TTC9, ADAM7, AIG1, AKT1, ANKS6, APC2, ARL2, BHE40, BT3A3, CC4L, CCR6, CDKL5, CH25H, DRD3, ECI2, EHMT2, ERI3, F234B, FGFR4, FOLR1, FOXA1, H4, HDAC1, HIC1, ICAM1, KCD15, KDM2A, LARP1, LIN37, LMNA, LYPA1, MAPK3, MDM2, MED28, MGP, MMP28, MUC2, MYC, NEK6, NEU1, NFKB1, NOM1, NPAT, NPM3, NUDT4, NXNL2, NXT2, OTOF, PKD1, PLD2, PRPH2, PSMD3, PSMG1, PTH2, PTPS, RAE1L, RER1, RIMS4, ROA1, RPAC1, SAE1, SDC4, SETBP, SF3B1, SIK2, SLIT3, SNX10, STAR8, STK39, TAF4, TIGD7, TRIM2, TRM7, VSIG4, WAC, XIAP, XKR4, ZNF16, ZYX, EXT1, VPS16, ABCC10, MAP3K11, MMP21, SENP5, LRIG3, PHF2, ADK, AP3B1, ATM, CACNG1, CDK4, CISH, CLDN1, CNOT1, CNOT3, CXCR4, ERCC1, ERCC5, ETF1, FLT4, HEATR1, IFITM3, IMP4, IP6K2, KCNK3, MAP2K7, NEK9, NOP2, PEMT, PI4KB, PRKCI, PRPF31, PSMD1, PTH1R, RAB10, RAB3D, RAN, RIPK2, SAR1A, SMURF2, SNW1, SRRM2, STK24, SUV420H1, TBK1, THAP11, TWIST1, USP11, WDR37, ADRB2, ALPK2, AP2M1, CAD, CANT1, CCDC134, CCL2, CD83, CLOCK, CSF2, DDX21, DDX55, DDX60L, DHRS3, EIF3B, EP300, FAS, FOXJ2, FSCN1, GSK3B, IKBKG, KHK, KLRB1, KPNB1, KRR1, LRRN3, MAP3K9, MED6, MED7, MED8, MICB, MID1IP1, MTFR1, NCBP2, NOS3, NUP107, NUP153, NUP93, NUP98, OASL, OGFR, PARP4, PCGF6, PPP1R12C, PPP1R14D, PRKDC, PSMA1, PSMC4, PSMC5, PSMD12, RAB1B, RBM5, RCL1, RFWD2, RUSC2, RXRA, SCN3A, SF3A1, SF3B2, SLC46A1, SMAD3, SNRPA1, SNRPD3, SOX13, SP110, STK10, STK3, STX5, SULF2, TDRD1, TGS1, TOP3B, UMPS, VDR, WDR5, ARHGAP23, DCAF13, FBL, FCF1, GBF1, HSPA9, PPP1R15B, PWP2, SLC9A3, UTP6, Sep-05, NR4A1,

---

RAB6B, ACRC, ATCAY, ATP6AP2, ATP6V1B2, ELK1, FBXL5, G6PC3, IFI35, IL9R, PPP2R5C, PSMB3, RNF44, RPL13A, RPS14, SHC1, TDG, TRAF6, WDR18, ATP1F1, CDK15, FRS2, GRM2, CUL3, KCNK6, MSMB, PAK1, TRPC3, ATP6V1B1, CHML, PPP5C, RPS29

**Table S3.** Statistics of GWAS analysis

| S. No. | Virus                                     | Total entries | Unique genes | Number of diseases |
|--------|-------------------------------------------|---------------|--------------|--------------------|
| 1.     | Adeno-associated virus (AAV)              | 42            | 32           | 36                 |
| 2.     | Avian influenza virus (AIV)               | 2             | 1            | 2                  |
| 3.     | Borna disease virus (BDV)                 | 22            | 9            | 17                 |
| 4.     | Dengue virus 2 (DEN-2)                    | 13            | 6            | 12                 |
| 5.     | Hepatitis C virus (HCV)                   | 109           | 72           | 77                 |
| 6.     | Human immunodeficiency virus 1 (HIV-1)    | 291           | 183          | 185                |
| 7.     | Human parainfluenza virus 3 (HPIV-3)      | 1             | 1            | 1                  |
| 8.     | Human herpesvirus 1 (HSV-1)               | 21            | 11           | 20                 |
| 9.     | Influenza A virus (IAV)                   | 404           | 247          | 211                |
| 10.    | Lymphocytic choriomeningitis virus (LCMV) | 4             | 4            | 3                  |
| 11.    | Marburgvirus (MARV)                       | 2             | 1            | 2                  |
| 12.    | Poliovirus (PV)                           | 203           | 121          | 129                |
| 13.    | Rotavirus (RV)                            | 162           | 102          | 111                |
| 14.    | Sendai virus (SeV)                        | 13            | 3            | 10                 |
| 15.    | Sindbis virus (SIV)                       | 32            | 20           | 25                 |
| 16.    | Vaccinia virus (VACV)                     | 179           | 121          | 125                |
| 17.    | Vesicular stomatitis virus (VSV)          | 17            | 9            | 11                 |
| 18.    | West Nile virus (WNV)                     | 72            | 48           | 57                 |
